# Supplementary material for: Microplastics in river water: occurrence, weathering, and adsorption behaviour
Source: Royal Society of Chemistry journal article supplement (doi:10.1039/d5ew00614g), 2025-11-10
Supplement: d5ew00614g1.pdf [file d5ew00614g1.pdf]

## Microplastics in River Water: Occurrence, Weathering, and Adsorption Behaviour

Bishwatma Biswas <sup>a</sup>, Anuja Joseph <sup>b</sup>, Sudha Goel <sup>a,b</sup>

<sup>a</sup> Environmental Engineering and Management, Department of Civil Engineering, IIT Kharagpur, West Bengal-721302, India

<sup>b</sup> School of Environmental Science and Engineering, Indian Institute of Technology Kharagpur, Kharagpur, West Bengal 721302, India

### Supplementary file

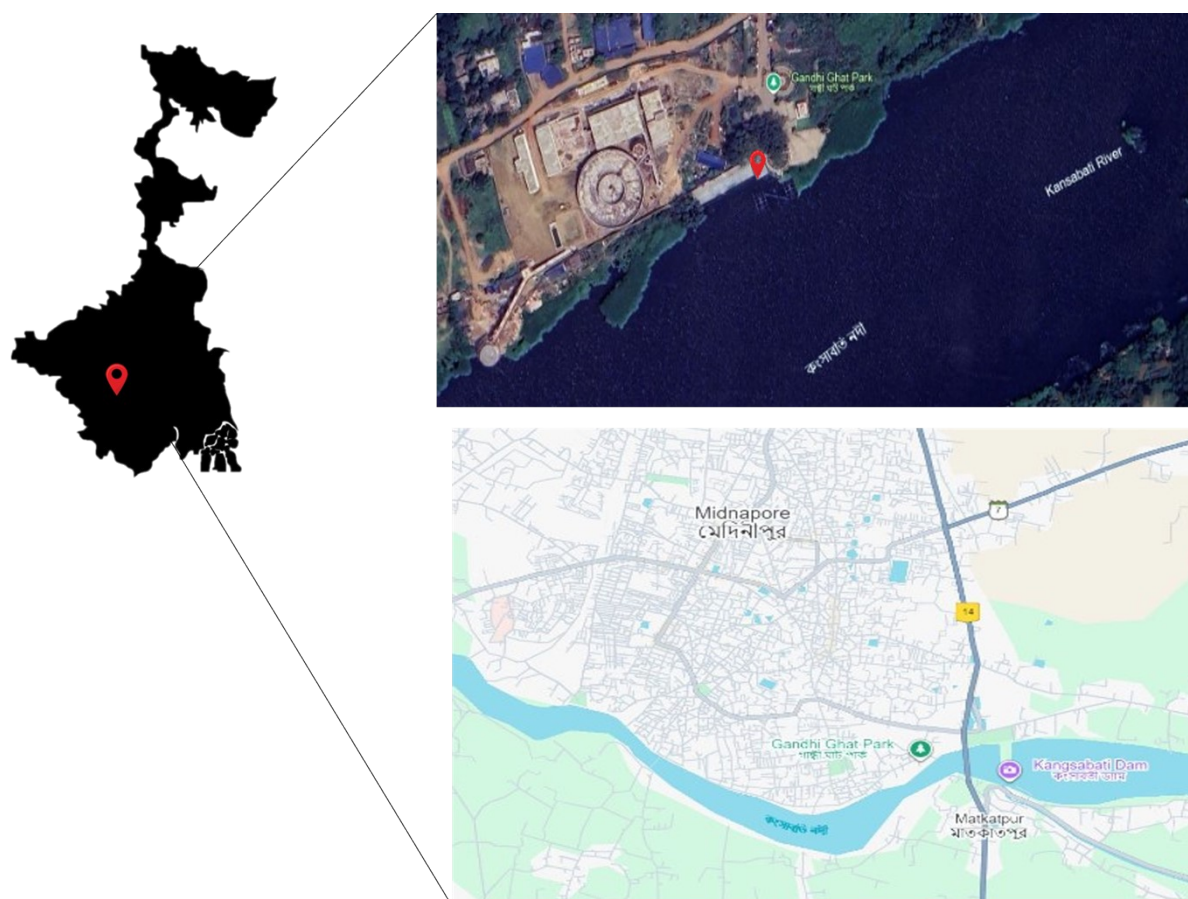

**Fig. S1.** Map of the sampling location along the river, highlighting the wastewater treatment plant discharge point, and adjacent agricultural fields along the riverbanks (Source: Google Maps).
